# Supplementary material for: Sequestration Effect on the Open-Cyclic Switchable Property of Warfarin by Cyclodextrin: Ultrafast Dynamical Study
Source: Preprints.org preprint supplement (doi:10.20944/preprints201707.0059.v1), 2017-07-21
Supplement: Supplementary file 1 [file supplementary]

SUPPORTING INFORMATION

**Sequestration Effect on the Open-Cyclic Switchable Property of Warfarin by Cyclodextrin: Ultrafast Dynamical Study**

Naji Al-Dubaili and Na’il Saleh*

*Chemistry Department, College of Science, United Arab Emirates University, P.O.Box 15551, Al-Ain, United Arab Emirates*

**Chart S1.** The structures of selected *β*-cyclodextrins macrocycles in the present work that were not previously studied for their interactions with W.


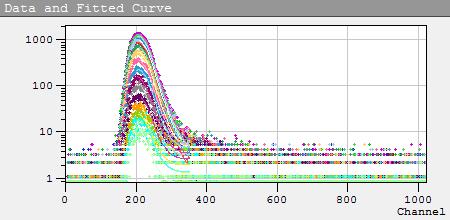


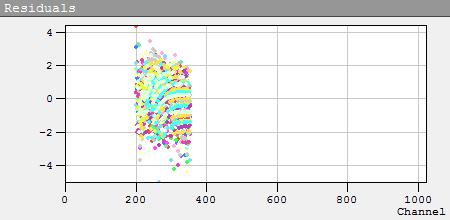


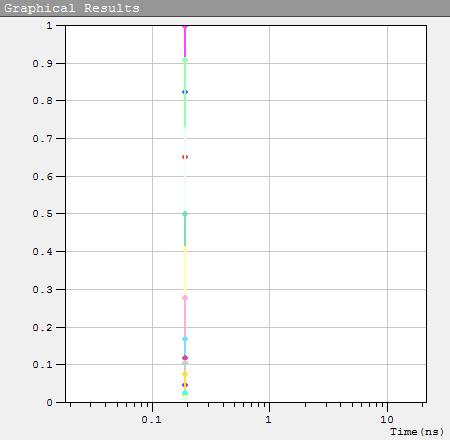


**Figure S1.** Collected emission decays measured over the emission spectrum of W at pH 3, excited at 320 nm (Figure 6A) from 330 to 490 nm every 10 nm with a dwell time of 50 s at each wavelength. Data at each wavelength were fitted to a mono-exponential model convoluted with IRF ~ 90 ps (as shown in the residuals), see Appendix I for fitting parameters.

| 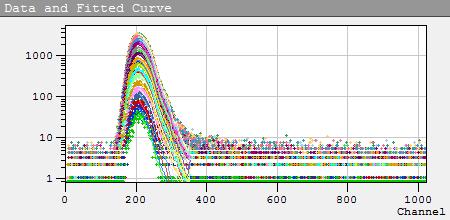 |
| --- |


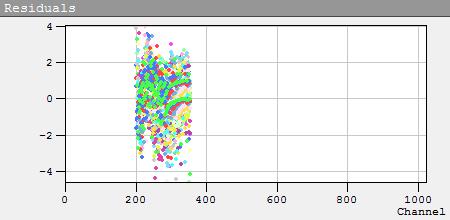


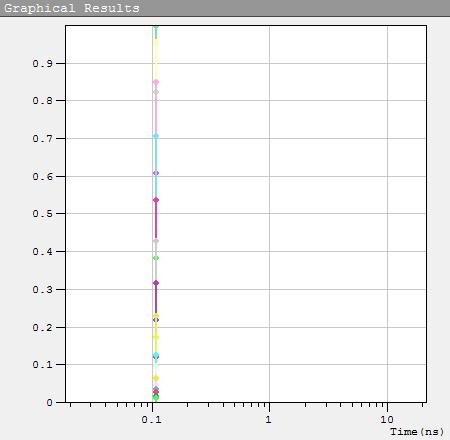


**Figure S2.** Collected emission decays measured over the emission spectrum of W at pH 9, excited at 320 nm (Figure 5) from 330 to 550 nm every 10 nm with a dwell time of 50 s at each wavelength. Data at each wavelength were fitted to a mono-exponential model convoluted with IRF ~ 90 ps (as shown in the residuals), see Appendix II for fitting parameters.


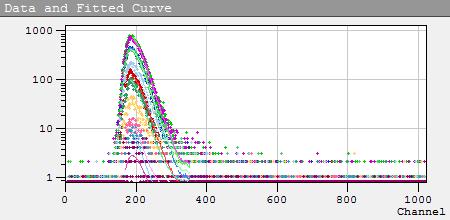


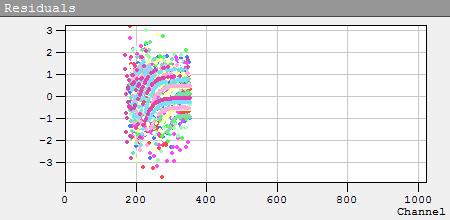


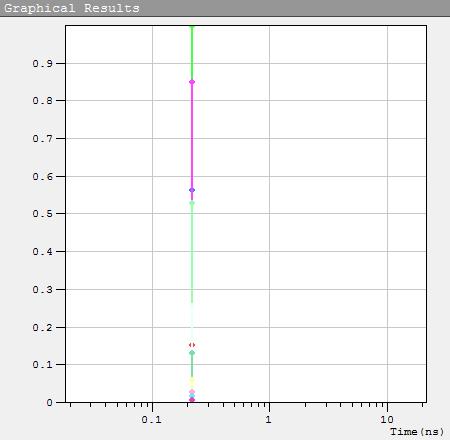


**Figure S3.** Collected emission decays measured over the emission spectrum of W at pH 3, excited at 280 nm (Figure 6B) from 310 to 510 nm every 20 nm with a dwell time of 50 s at each wavelength. Data at each wavelength were fitted to a mono-exponential model convoluted with IRF ~90 ps (as shown in the residuals, see Appendix III for fitting parameters.


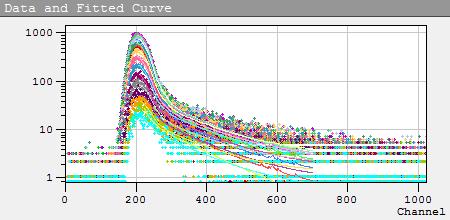


|  |
| --- |


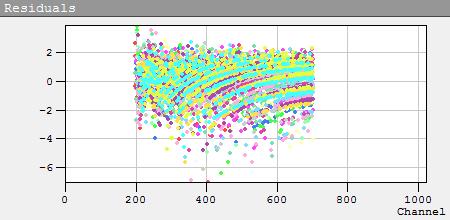


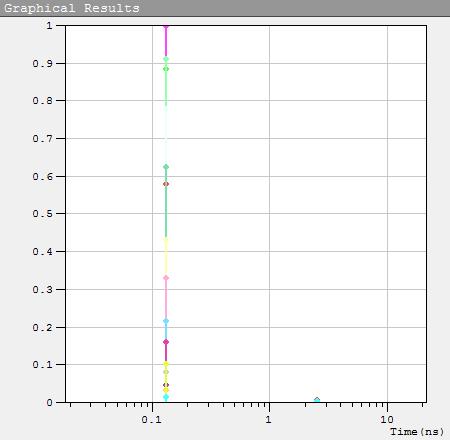


**Figure S4.** Collected emission decays measured over the emission spectrum of W-Me-*β*-CD at pH 3, excited at 320 nm (Figure 6A) from 330 to 480 nm every 10 nm with a dwell time of 50 s at each wavelength. Data at each wavelength were fitted to a bi-exponential model convoluted with IRF ~ 90 ps (as shown in the residuals), assuming 2 excited states that decay mono-exponentially in parallel (Figure 8A),11 see Appendix IV for fitting parameters.

| 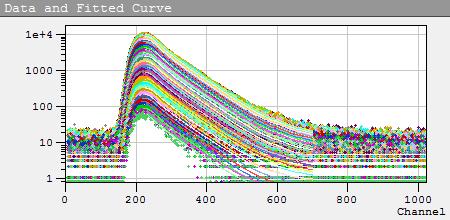 |
| --- |


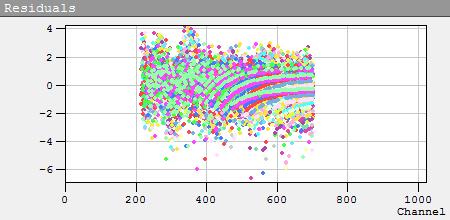


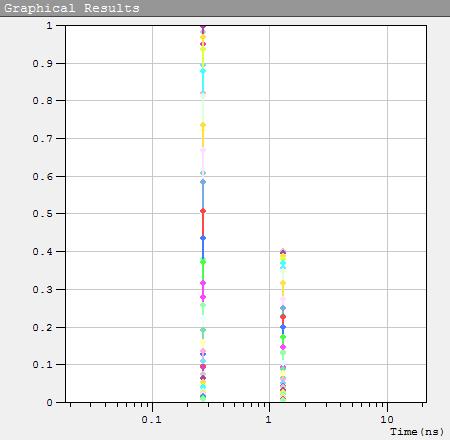


**Figure S5.** Collected emission decays measured over the emission spectrum of W-Me-*β*-CD at pH 9, excited at 320 nm (Figure 5) from 330 to 550 nm every 5 nm with a dwell time of 50 s at each wavelength. Data at each wavelength were fitted to a bi-exponential model convoluted with IRF~ 90 ps (as shown in the residuals), assuming 2 excited states that decay bi-exponentially in parallel (Figure 8B),11 see Appendix V.


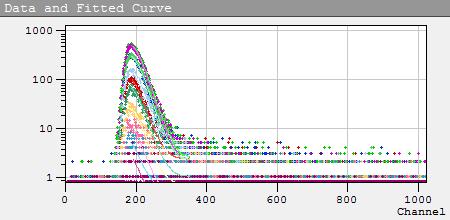


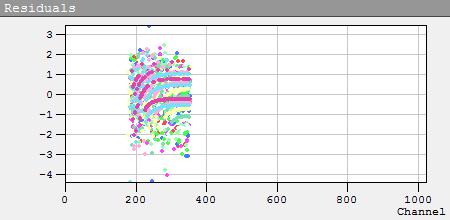


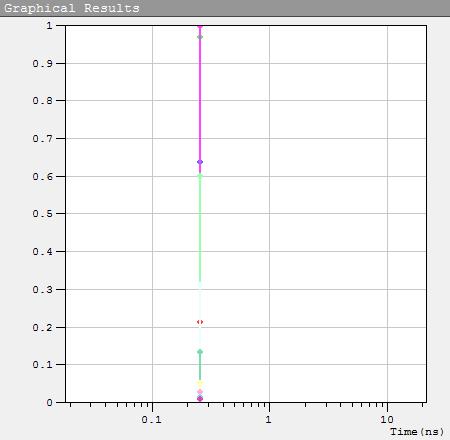


**Figure S6.** Collected emission decays measured over the emission spectrum of W-Me-*β*-CD at pH 3, excited at 280 nm (Figure 6B) from 310 to 510 nm every 20 nm with a dwell time of 50 s at each wavelength. Data at each wavelength were fitted to a mono-exponential model convoluted with IRF ~ 90 ps (as shown in the residuals), see Appendix VI.

**Figure S7.** UV–Visible absorption titration of W (25 μM) with Ac-*β*-CD at pH 3 (A), and pH 9 (B); the *inset* shows the corresponding titration curve and the 1:1 binding fit (solid line) with *K* = (5.5 ± 78) M‒1. The very large error in binding affinity reflects very weak binding.

**Figure S8.** UV–visible absorption spectra at different pH values of W in water and inside HE-*β*-CD, Ac-*β*-CD, and Me-*β*-CD hosts. The sigmoidal fitting error for each extracted p*K*a at 280 (CYCLIC) and 320 nm (OPEN) are shown in the *insets*.

**Figure S9.** Fluorescence spectra of W (25 µM) at pH 3 and 9 with *λ*ex = 320 nm and *λ*ex = 280 nm as labeled by a distinct color. While no change in peak position, spectra of neutral W excited at 280 nm (dark yellow) and 320 nm (dark green) are different.

**Figure S10.** Fluorescence spectra of W (25 µM) at pH 3 upon the addition of Me-*β*-CD up to 250 µM (10 equiv.) with *λ*ex = 320 nm (A); *λ*ex = 280 nm (B), no significant changes in spectra were observed.

**APPENDIX I**

**Global Analysis Data of W (pH 3; 320 nm)**

**File: Em1=330.00nm**

**Global Analysis (Reconvolution)**

| Fitting range | :  [198; 350] channels |
| --- | --- |
| | Global | ² | | --- | --- | | :  1.330 |
| ² | :  1.373 |

|  | Bi | | fi | i (ns) | |
| --- | --- | --- | --- | --- | --- |
| 1 | 0.1193 |  | 100.00 | 0.182 | linked |

| Shift | :  -0.0623 ns |
| --- | --- |
| Decay Background | :  1.7676 |
| IRF Background | :  0.6000 |

**File: Em1=340.00nm**

**Global Analysis (Reconvolution)**

| Fitting range | :  [198; 350] channels |
| --- | --- |
| | Global | ² | | --- | --- | | :  1.330 |
| ² | :  1.317 |

|  | Bi | | fi | i (ns) | |
| --- | --- | --- | --- | --- | --- |
| 1 | 0.1511 |  | 100.00 | 0.182 | linked |

| Shift | :  -0.0843 ns |
| --- | --- |
| Decay Background | :  2.6230 |
| IRF Background | :  0.6000 |

**File: Em1=350.00nm**

**Global Analysis (Reconvolution)**

| Fitting range | :  [203; 350] channels |
| --- | --- |
| | Global | ² | | --- | --- | | :  1.330 |
| ² | :  1.502 |

|  | Bi | | fi | i (ns) | |
| --- | --- | --- | --- | --- | --- |
| 1 | 0.1835 |  | 100.00 | 0.182 | linked |

| Shift | :  -0.0662 ns |
| --- | --- |
| Decay Background | :  3.3868 |
| IRF Background | :  0.6000 |

**File: Em1=360.00nm**

**Global Analysis (Reconvolution)**

| Fitting range | :  [205; 350] channels |
| --- | --- |
| | Global | ² | | --- | --- | | :  1.330 |
| ² | :  1.284 |

|  | Bi | | fi | i (ns) | |
| --- | --- | --- | --- | --- | --- |
| 1 | 0.1830 |  | 100.00 | 0.182 | linked |

| Shift | :  -0.0390 ns |
| --- | --- |
| Decay Background | :  5.2076 |
| IRF Background | :  0.6000 |

**File: Em1=370.00nm**

**Global Analysis (Reconvolution)**

| Fitting range | :  [199; 350] channels |
| --- | --- |
| | Global | ² | | --- | --- | | :  1.330 |
| ² | :  1.108 |

|  | Bi | | fi | i (ns) | |
| --- | --- | --- | --- | --- | --- |
| 1 | 0.1667 |  | 100.00 | 0.182 | linked |

| Shift | :  -0.0609 ns |
| --- | --- |
| Decay Background | :  5.1108 |
| IRF Background | :  0.6000 |

**File: Em1=380.00nm**

**Global Analysis (Reconvolution)**

| Fitting range | :  [206; 350] channels |
| --- | --- |
| | Global | ² | | --- | --- | | :  1.330 |
| ² | :  1.399 |

|  | Bi | | fi | i (ns) | |
| --- | --- | --- | --- | --- | --- |
| 1 | 0.1327 |  | 100.00 | 0.182 | linked |

| Shift | :  -0.0579 ns |
| --- | --- |
| Decay Background | :  4.8014 |
| IRF Background | :  0.6000 |

**File: Em1=390.00nm**

**Global Analysis (Reconvolution)**

| Fitting range | :  [204; 350] channels |
| --- | --- |
| | Global | ² | | --- | --- | | :  1.330 |
| ² | :  1.121 |

|  | Bi | | fi | i (ns) | |
| --- | --- | --- | --- | --- | --- |
| 1 | 0.0915 |  | 100.00 | 0.182 | linked |

| Shift | :  -0.0348 ns |
| --- | --- |
| Decay Background | :  5.0537 |
| IRF Background | :  0.6000 |

**File: Em1=400.00nm**

**Global Analysis (Reconvolution)**

| Fitting range | :  [199; 350] channels |
| --- | --- |
| | Global | ² | | --- | --- | | :  1.330 |
| ² | :  1.309 |

|  | Bi | | fi | i (ns) | |
| --- | --- | --- | --- | --- | --- |
| 1 | 0.0742 |  | 100.00 | 0.182 | linked |

| Shift | :  -0.0820 ns |
| --- | --- |
| Decay Background | :  4.7219 |
| IRF Background | :  0.6000 |

**File: Em1=410.00nm**

**Global Analysis (Reconvolution)**

| Fitting range | :  [203; 350] channels |
| --- | --- |
| | Global | ² | | --- | --- | | :  1.330 |
| ² | :  1.611 |

|  | Bi | | fi | i (ns) | |
| --- | --- | --- | --- | --- | --- |
| 1 | 0.0505 |  | 100.00 | 0.182 | linked |

| Shift | :  -0.0890 ns |
| --- | --- |
| Decay Background | :  5.1625 |
| IRF Background | :  0.6000 |

**File: Em1=420.00nm**

**Global Analysis (Reconvolution)**

| Fitting range | :  [198; 350] channels |
| --- | --- |
| | Global | ² | | --- | --- | | :  1.330 |
| ² | :  1.370 |

|  | Bi | | fi | i (ns) | |
| --- | --- | --- | --- | --- | --- |
| 1 | 0.0305 |  | 100.00 | 0.182 | linked |

| Shift | :  -0.0587 ns |
| --- | --- |
| Decay Background | :  4.5170 |
| IRF Background | :  0.6000 |

**File: Em1=430.00nm**

**Global Analysis (Reconvolution)**

| Fitting range | :  [199; 350] channels |
| --- | --- |
| | Global | ² | | --- | --- | | :  1.330 |
| ² | :  1.577 |

|  | Bi | | fi | i (ns) | |
| --- | --- | --- | --- | --- | --- |
| 1 | 0.0214 |  | 100.00 | 0.182 | linked |

| Shift | :  -0.1367 ns |
| --- | --- |
| Decay Background | :  3.5061 |
| IRF Background | :  0.6000 |

**File: Em1=440.00nm**

**Global Analysis (Reconvolution)**

| Fitting range | :  [207; 350] channels |
| --- | --- |
| | Global | ² | | --- | --- | | :  1.330 |
| ² | :  1.943 |

|  | Bi | | fi | i (ns) | |
| --- | --- | --- | --- | --- | --- |
| 1 | 0.0187 |  | 100.00 | 0.182 | linked |

| Shift | :  -0.2734 ns |
| --- | --- |
| Decay Background | :  3.2706 |
| IRF Background | :  0.6000 |

**File: Em1=450.00nm**

**Global Analysis (Reconvolution)**

| Fitting range | :  [210; 350] channels |
| --- | --- |
| | Global | ² | | --- | --- | | :  1.330 |
| ² | :  1.086 |

|  | Bi | | fi | i (ns) | |
| --- | --- | --- | --- | --- | --- |
| 1 | 0.0079 |  | 100.00 | 0.182 | linked |

| Shift | :  -0.0781 ns |
| --- | --- |
| Decay Background | :  2.6210 |
| IRF Background | :  0.6000 |

**File: Em1=460.00nm**

**Global Analysis (Reconvolution)**

| Fitting range | :  [210; 350] channels |
| --- | --- |
| | Global | ² | | --- | --- | | :  1.330 |
| ² | :  1.479 |

|  | Bi | | fi | i (ns) | |
| --- | --- | --- | --- | --- | --- |
| 1 | 0.0136 |  | 100.00 | 0.182 | linked |

| Shift | :  -0.5469 ns |
| --- | --- |
| Decay Background | :  1.9734 |
| IRF Background | :  0.6000 |

**File: Em1=470.00nm**

**Global Analysis (Reconvolution)**

| Fitting range | :  [201; 350] channels |
| --- | --- |
| | Global | ² | | --- | --- | | :  1.330 |
| ² | :  1.158 |

|  | Bi | | fi | i (ns) | |
| --- | --- | --- | --- | --- | --- |
| 1 | 0.0032 |  | 100.00 | 0.182 | linked |

| Shift | :  -0.0977 ns |
| --- | --- |
| Decay Background | :  1.3457 |
| IRF Background | :  0.6000 |

**File: Em1=480.00nm**

| Fitting range | :  [227; 350] channels |
| --- | --- |
| | Global | ² | | --- | --- | | :  1.330 |
| ² | :  0.955 |

|  | Bi | | fi | i (ns) | |
| --- | --- | --- | --- | --- | --- |
| 1 | 0.0041 |  | 100.00 | 0.182 | linked |

| Shift | :  -0.2148 ns |
| --- | --- |
| Decay Background | :  1.3984 |
| IRF Background | :  0.6000 |

**File: Em1=490.00nm**

**Global Analysis (Reconvolution)**

| Fitting range | :  [202; 350] channels |
| --- | --- |
| | Global | ² | | --- | --- | | :  1.330 |
| ² | :  0.968 |

|  | Bi | | fi | i (ns) | |
| --- | --- | --- | --- | --- | --- |
| 1 | 0.0018 |  | 100.00 | 0.182 | linked |

| Shift | :  -0.2736 ns |
| --- | --- |
| Decay Background | :  0.7885 |
| IRF Background | :  0.6000 |

**APPENDIX II**

**Global Analysis Data of W (pH 9; 320 nm)**

**File: Em1=330.00nm**

**Global Analysis (Reconvolution)**

| Fitting range | :  [198; 350] channels |
| --- | --- |
| | Global | ² | | --- | --- | | :  1.436 |
| ² | :  1.248 |

|  | Bi | | fi | i (ns) | |
| --- | --- | --- | --- | --- | --- |
| 1 | 0.0992 |  | 100.00 | 0.104 | linked |

| Shift | :  -0.0028 ns |
| --- | --- |
| Decay Background | :  0.5518 |
| IRF Background | :  0.6000 |

**File: Em1=340.00nm**

**Global Analysis (Reconvolution)**

| Fitting range | :  [198; 350] channels |
| --- | --- |
| | Global | ² | | --- | --- | | :  1.436 |
| ² | :  1.447 |

|  | Bi | | fi | i (ns) | |
| --- | --- | --- | --- | --- | --- |
| 1 | 0.1835 |  | 100.00 | 0.104 | linked |

| Shift | :  -0.0064 ns |
| --- | --- |
| Decay Background | :  1.1423 |
| IRF Background | :  0.6000 |

**File: Em1=350.00nm**

**Global Analysis (Reconvolution)**

| Fitting range | :  [201; 350] channels |
| --- | --- |
| | Global | ² | | --- | --- | | :  1.436 |
| ² | :  1.553 |

|  | Bi | | fi | i (ns) | |
| --- | --- | --- | --- | --- | --- |
| 1 | 0.3226 |  | 100.00 | 0.104 | linked |

| Shift | :  0.0332 ns |
| --- | --- |
| Decay Background | :  3.0877 |
| IRF Background | :  0.6000 |

**File: Em1=360.00nm**

**Global Analysis (Reconvolution)**

| Fitting range | :  [204; 350] channels |
| --- | --- |
| | Global | ² | | --- | --- | | :  1.436 |
| ² | :  1.601 |

|  | Bi | | fi | i (ns) | |
| --- | --- | --- | --- | --- | --- |
| 1 | 0.5130 |  | 100.00 | 0.104 | linked |

| Shift | :  0.0276 ns |
| --- | --- |
| Decay Background | :  3.2082 |
| IRF Background | :  0.6000 |

**File: Em1=370.00nm**

**Global Analysis (Reconvolution)**

| Fitting range | :  [201; 350] channels |
| --- | --- |
| | Global | ² | | --- | --- | | :  1.436 |
| ² | :  2.018 |

|  | Bi | | fi | i (ns) | |
| --- | --- | --- | --- | --- | --- |
| 1 | 0.6966 |  | 100.00 | 0.104 | linked |

| Shift | :  0.0253 ns |
| --- | --- |
| Decay Background | :  4.3292 |
| IRF Background | :  0.6000 |

**File: Em1=380.00nm**

**Global Analysis (Reconvolution)**

| Fitting range | :  [203; 350] channels |
| --- | --- |
| | Global | ² | | --- | --- | | :  1.436 |
| ² | :  1.667 |

|  | Bi | | fi | i (ns) | |
| --- | --- | --- | --- | --- | --- |
| 1 | 0.8048 |  | 100.00 | 0.104 | linked |

| Shift | :  0.0334 ns |
| --- | --- |
| Decay Background | :  4.5986 |
| IRF Background | :  0.6000 |

**File: Em1=390.00nm**

**Global Analysis (Reconvolution)**

| Fitting range | :  [202; 350] channels |
| --- | --- |
| | Global | ² | | --- | --- | | :  1.436 |
| ² | :  1.906 |

|  | Bi | | fi | i (ns) | |
| --- | --- | --- | --- | --- | --- |
| 1 | 0.8458 |  | 100.00 | 0.104 | linked |

| Shift | :  0.0291 ns |
| --- | --- |
| Decay Background | :  4.6974 |
| IRF Background | :  0.6000 |

**File: Em1=400.00nm**

**Global Analysis (Reconvolution)**

| Fitting range | :  [202; 350] channels |
| --- | --- |
| | Global | ² | | --- | --- | | :  1.436 |
| ² | :  1.812 |

|  | Bi | | fi | i (ns) | |
| --- | --- | --- | --- | --- | --- |
| 1 | 0.8080 |  | 100.00 | 0.104 | linked |

| Shift | :  0.0336 ns |
| --- | --- |
| Decay Background | :  4.4687 |
| IRF Background | :  0.6000 |

**File: Em1=410.00nm**

**Global Analysis (Reconvolution)**

| Fitting range | :  [203; 350] channels |
| --- | --- |
| | Global | ² | | --- | --- | | :  1.436 |
| ² | :  2.044 |

|  | Bi | | fi | i (ns) | |
| --- | --- | --- | --- | --- | --- |
| 1 | 0.7190 |  | 100.00 | 0.104 | linked |

| Shift | :  0.0345 ns |
| --- | --- |
| Decay Background | :  3.7058 |
| IRF Background | :  0.6000 |

**File: Em1=420.00nm**

**Global Analysis (Reconvolution)**

| Fitting range | :  [204; 350] channels |
| --- | --- |
| | Global | ² | | --- | --- | | :  1.436 |
| ² | :  2.066 |

|  | Bi | | fi | i (ns) | |
| --- | --- | --- | --- | --- | --- |
| 1 | 0.5974 |  | 100.00 | 0.104 | linked |

| Shift | :  0.0492 ns |
| --- | --- |
| Decay Background | :  2.7790 |
| IRF Background | :  0.6000 |

**File: Em1=430.00nm**

**Global Analysis (Reconvolution)**

| Fitting range | :  [205; 350] channels |
| --- | --- |
| | Global | ² | | --- | --- | | :  1.436 |
| ² | :  2.049 |

|  | Bi | | fi | i (ns) | |
| --- | --- | --- | --- | --- | --- |
| 1 | 0.4522 |  | 100.00 | 0.104 | linked |

| Shift | :  0.0781 ns |
| --- | --- |
| Decay Background | :  2.6920 |
| IRF Background | :  0.6000 |

**File: Em1=440.00nm**

**Global Analysis (Reconvolution)**

| Fitting range | :  [199; 350] channels |
| --- | --- |
| | Global | ² | | --- | --- | | :  1.436 |
| ² | :  1.753 |

|  | Bi | | fi | i (ns) | |
| --- | --- | --- | --- | --- | --- |
| 1 | 0.3605 |  | 100.00 | 0.104 | linked |

| Shift | :  0.0530 ns |
| --- | --- |
| Decay Background | :  2.1747 |
| IRF Background | :  0.6000 |

**File: Em1=450.00nm**

**Global Analysis (Reconvolution)**

| Fitting range | :  [204; 350] channels |
| --- | --- |
| | Global | ² | | --- | --- | | :  1.436 |
| ² | :  1.301 |

|  | Bi | | fi | i (ns) | |
| --- | --- | --- | --- | --- | --- |
| 1 | 0.2664 |  | 100.00 | 0.104 | linked |

| Shift | :  0.0479 ns |
| --- | --- |
| Decay Background | :  1.4656 |
| IRF Background | :  0.6000 |

**File: Em1=460.00nm**

**Global Analysis (Reconvolution)**

| Fitting range | :  [203; 350] channels |
| --- | --- |
| | Global | ² | | --- | --- | | :  1.436 |
| ² | :  1.305 |

|  | Bi | | fi | i (ns) | |
| --- | --- | --- | --- | --- | --- |
| 1 | 0.1934 |  | 100.00 | 0.104 | linked |

| Shift | :  0.0499 ns |
| --- | --- |
| Decay Background | :  0.9652 |
| IRF Background | :  0.6000 |

**File: Em1=470.00nm**

**Global Analysis (Reconvolution)**

| Fitting range | :  [200; 350] channels |
| --- | --- |
| | Global | ² | | --- | --- | | :  1.436 |
| ² | :  1.139 |

|  | Bi | | fi | i (ns) | |
| --- | --- | --- | --- | --- | --- |
| 1 | 0.1461 |  | 100.00 | 0.104 | linked |

| Shift | :  0.0306 ns |
| --- | --- |
| Decay Background | :  0.7773 |
| IRF Background | :  0.6000 |

**File: Em1=480.00nm**

**Global Analysis (Reconvolution)**

| Fitting range | :  [202; 350] channels |
| --- | --- |
| | Global | ² | | --- | --- | | :  1.436 |
| ² | :  1.251 |

|  | Bi | | fi | i (ns) | |
| --- | --- | --- | --- | --- | --- |
| 1 | 0.1048 |  | 100.00 | 0.104 | linked |

| Shift | :  0.0420 ns |
| --- | --- |
| Decay Background | :  0.6611 |
| IRF Background | :  0.6000 |

**File: Em1=490.00nm**

**Global Analysis (Reconvolution)**

| Fitting range | :  [207; 350] channels |
| --- | --- |
| | Global | ² | | --- | --- | | :  1.436 |
| ² | :  1.041 |

|  | Bi | | fi | i (ns) | |
| --- | --- | --- | --- | --- | --- |
| 1 | 0.0796 |  | 100.00 | 0.104 | linked |

| Shift | :  0.0195 ns |
| --- | --- |
| Decay Background | :  0.5155 |
| IRF Background | :  0.6000 |

**File: Em1=500.00nm**

**Global Analysis (Reconvolution)**

| Fitting range | :  [207; 350] channels |
| --- | --- |
| | Global | ² | | --- | --- | | :  1.436 |
| ² | :  0.994 |

|  | Bi | | fi | i (ns) | |
| --- | --- | --- | --- | --- | --- |
| 1 | 0.0534 |  | 100.00 | 0.104 | linked |

| Shift | :  0.0276 ns |
| --- | --- |
| Decay Background | :  0.4548 |
| IRF Background | :  0.6000 |

**File: Em1=510.00nm**

**Global Analysis (Reconvolution)**

| Fitting range | :  [203; 350] channels |
| --- | --- |
| | Global | ² | | --- | --- | | :  1.436 |
| ² | :  0.872 |

|  | Bi | | fi | i (ns) | |
| --- | --- | --- | --- | --- | --- |
| 1 | 0.0366 |  | 100.00 | 0.104 | linked |

| Shift | :  0.0195 ns |
| --- | --- |
| Decay Background | :  0.3143 |
| IRF Background | :  0.6000 |

**File: Em1=520.00nm**

**Global Analysis (Reconvolution)**

| Fitting range | :  [206; 350] channels |
| --- | --- |
| | Global | ² | | --- | --- | | :  1.436 |
| ² | :  1.267 |

|  | Bi | | fi | i (ns) | |
| --- | --- | --- | --- | --- | --- |
| 1 | 0.0290 |  | 100.00 | 0.104 | linked |

| Shift | :  -0.0585 ns |
| --- | --- |
| Decay Background | :  0.1086 |
| IRF Background | :  0.6000 |

**File: Em1=530.00nm**

**Global Analysis (Reconvolution)**

| Fitting range | :  [204; 350] channels |
| --- | --- |
| | Global | ² | | --- | --- | | :  1.436 |
| ² | :  0.951 |

|  | Bi | | fi | i (ns) | |
| --- | --- | --- | --- | --- | --- |
| 1 | 0.0204 |  | 100.00 | 0.104 | linked |

| Shift | :  -0.1172 ns |
| --- | --- |
| Decay Background | :  0.1034 |
| IRF Background | :  0.6000 |

**File: Em1=540.00nm**

**Global Analysis (Reconvolution)**

| Fitting range | :  [199; 350] channels |
| --- | --- |
| | Global | ² | | --- | --- | | :  1.436 |
| ² | :  0.988 |

|  | Bi | | fi | i (ns) | |
| --- | --- | --- | --- | --- | --- |
| 1 | 0.0132 |  | 100.00 | 0.104 | linked |

| Shift | :  -0.1172 ns |
| --- | --- |
| Decay Background | :  0.0268 |
| IRF Background | :  0.6000 |

**File: Em1=550.00nm**

**Global Analysis (Reconvolution)**

| Fitting range | :  [201; 350] channels |
| --- | --- |
| | Global | ² | | --- | --- | | :  1.436 |
| ² | :  0.751 |

|  | Bi | | fi | i (ns) | |
| --- | --- | --- | --- | --- | --- |
| 1 | 0.0089 |  | 100.00 | 0.104 | linked |

| Shift | :  -0.0918 ns |
| --- | --- |
| Decay Background | :  0.0312 |
| IRF Background | :  0.6000 |

**APPENDIX III**

**Global Analysis Data of W (pH 3; 280 nm)**

**File: Em1=310.00nm**

**Global Analysis (Reconvolution)**

| Fitting range | :  [182; 350] channels |
| --- | --- |
| | Global | ² | | --- | --- | | :  0.934 |
| ² | :  1.185 |

|  | Bi | | fi | i (ns) | |
| --- | --- | --- | --- | --- | --- |
| 1 | 0.0161 |  | 100.00 | 0.210 | linked |

| Shift | :  -0.1562 ns |
| --- | --- |
| Decay Background | :  0.6212 |
| IRF Background | :  0.3000 |

**File: Em1=330.00nm**

**Global Analysis (Reconvolution)**

| Fitting range | :  [178; 350] channels |
| --- | --- |
| | Global | ² | | --- | --- | | :  0.934 |
| ² | :  0.935 |

|  | Bi | | fi | i (ns) | |
| --- | --- | --- | --- | --- | --- |
| 1 | 0.0597 |  | 100.00 | 0.210 | linked |

| Shift | :  -0.1969 ns |
| --- | --- |
| Decay Background | :  0.7525 |
| IRF Background | :  0.3000 |

**File: Em1=350.00nm**

**Global Analysis (Reconvolution)**

| Fitting range | :  [186; 350] channels |
| --- | --- |
| | Global | ² | | --- | --- | | :  0.934 |
| ² | :  1.057 |

|  | Bi | | fi | i (ns) | |
| --- | --- | --- | --- | --- | --- |
| 1 | 0.1064 |  | 100.00 | 0.210 | linked |

| Shift | :  -0.1953 ns |
| --- | --- |
| Decay Background | :  1.3562 |
| IRF Background | :  0.3000 |

**File: Em1=370.00nm**

**Global Analysis (Reconvolution)**

| Fitting range | :  [182; 350] channels |
| --- | --- |
| | Global | ² | | --- | --- | | :  0.934 |
| ² | :  1.427 |

|  | Bi | | fi | i (ns) | |
| --- | --- | --- | --- | --- | --- |
| 1 | 0.0905 |  | 100.00 | 0.210 | linked |

| Shift | :  -0.1325 ns |
| --- | --- |
| Decay Background | :  1.6502 |
| IRF Background | :  0.3000 |

**File: Em1=390.00nm**

**Global Analysis (Reconvolution)**

| Fitting range | :  [180; 350] channels |
| --- | --- |
| | Global | ² | | --- | --- | | :  0.934 |
| ² | :  0.949 |

|  | Bi | | fi | i (ns) | |
| --- | --- | --- | --- | --- | --- |
| 1 | 0.0563 |  | 100.00 | 0.210 | linked |

| Shift | :  -0.1777 ns |
| --- | --- |
| Decay Background | :  1.0776 |
| IRF Background | :  0.3000 |

**File: Em1=410.00nm**

**Global Analysis (Reconvolution)**

| Fitting range | :  [184; 350] channels |
| --- | --- |
| | Global | ² | | --- | --- | | :  0.934 |
| ² | :  1.151 |

|  | Bi | | fi | i (ns) | |
| --- | --- | --- | --- | --- | --- |
| 1 | 0.0271 |  | 100.00 | 0.210 | linked |

| Shift | :  -0.1758 ns |
| --- | --- |
| Decay Background | :  1.1854 |
| IRF Background | :  0.3000 |

**File: Em1=430.00nm**

**Global Analysis (Reconvolution)**

| Fitting range | :  [180; 350] channels |
| --- | --- |
| | Global | ² | | --- | --- | | :  0.934 |
| ² | :  0.963 |

|  | Bi | | fi | i (ns) | |
| --- | --- | --- | --- | --- | --- |
| 1 | 0.0137 |  | 100.00 | 0.210 | linked |

| Shift | :  -0.2871 ns |
| --- | --- |
| Decay Background | :  0.8345 |
| IRF Background | :  0.3000 |

**File: Em1=450.00nm**

**Global Analysis (Reconvolution)**

| Fitting range | :  [188; 350] channels |
| --- | --- |
| | Global | ² | | --- | --- | | :  0.934 |
| ² | :  0.842 |

|  | Bi | | fi | i (ns) | |
| --- | --- | --- | --- | --- | --- |
| 1 | 0.0060 |  | 100.00 | 0.210 | linked |

| Shift | :  -0.3125 ns |
| --- | --- |
| Decay Background | :  0.5586 |
| IRF Background | :  0.3000 |

**File: Em1=470.00nm**

**Global Analysis (Reconvolution)**

| Fitting range | :  [187; 350] channels |
| --- | --- |
| | Global | ² | | --- | --- | | :  0.934 |
| ² | :  0.765 |

|  | Bi | | fi | i (ns) | |
| --- | --- | --- | --- | --- | --- |
| 1 | 0.0026 |  | 100.00 | 0.210 | linked |

| Shift | :  -0.4883 ns |
| --- | --- |
| Decay Background | :  0.5237 |
| IRF Background | :  0.3000 |

**File: Em1=490.00nm**

**Global Analysis (Reconvolution)**

| Fitting range | :  [185; 350] channels |
| --- | --- |
| | Global | ² | | --- | --- | | :  0.934 |
| ² | :  0.503 |

|  | Bi | | fi | i (ns) | |
| --- | --- | --- | --- | --- | --- |
| 1 | 0.0016 |  | 100.00 | 0.210 | linked |

| Shift | :  -0.4687 ns |
| --- | --- |
| Decay Background | :  0.2748 |
| IRF Background | :  0.3000 |

**File: Em1=510.00nm**

**Global Analysis (Reconvolution)**

| Fitting range | :  [166; 350] channels |
| --- | --- |
| | Global | ² | | --- | --- | | :  0.934 |
| ² | :  0.524 |

|  | Bi | | fi | i (ns) | |
| --- | --- | --- | --- | --- | --- |
| 1 | 0.0004 |  | 100.00 | 0.210 | linked |

| Shift | :  -0.0504 ns |
| --- | --- |
| Decay Background | :  0.0985 |
| IRF Background | :  0.3000 |

**APPENDIX IV**

**Global Analysis Data of W-Me-*β*-CD (pH 3; 320 nm)**

**File: Em1=330.00nm**

**Global Analysis (Reconvolution)**

| Fitting range | :  [194; 700] channels |
| --- | --- |
| | Global | ² | | --- | --- | | :  1.302 |
| ² | :  1.081 |

|  | Bi | | fi | i (ns) | |
| --- | --- | --- | --- | --- | --- |
| 1 | 0.1037 |  | 92.15 | 0.127 | linked |
| 2 | 0.0005 |  | 7.8472 | 2.433 | linked |

| Shift | :  -0.0757 ns |
| --- | --- |
| Decay Background | :  0.4957 |
| IRF Background | :  0.6000 |

**File: Em1=340.00nm**

**Global Analysis (Reconvolution)**

| Fitting range | :  [198; 700] channels |
| --- | --- |
| | Global | ² | | --- | --- | | :  1.302 |
| ² | :  1.130 |

|  | Bi | | fi | i (ns) | |
| --- | --- | --- | --- | --- | --- |
| 1 | 0.1393 |  | 91.95 | 0.127 | linked |
| 2 | 0.0006 |  | 8.0530 | 2.433 | linked |

| Shift | :  -0.0730 ns |
| --- | --- |
| Decay Background | : 1.1128 |
| IRF Background | :  0.6000 |

**File: Em1=350.00nm**

**Global Analysis (Reconvolution)**

| Fitting range | :  [200; 700] channels |
| --- | --- |
| | Global | ² | | --- | --- | | :  1.302 |
| ² | :  1.408 |

|  | Bi | | fi | i (ns) | |
| --- | --- | --- | --- | --- | --- |
| 1 | 0.1586 |  | 91.31 | 0.127 | linked |
| 2 | 0.0008 |  | 8.6939 | 2.433 | linked |

| Shift | :  -0.0112 ns |
| --- | --- |
| Decay Background | :  1.8160 |
| IRF Background | :  0.6000 |

**File: Em1=360.00nm**

**Global Analysis (Reconvolution)**

| Fitting range | :  [198; 700] channels |
| --- | --- |
| | Global | ² | | --- | --- | | :  1.302 |
| ² | :  1.418 |

|  | Bi | | fi | i (ns) | |
| --- | --- | --- | --- | --- | --- |
| 1 | 0.1792 |  | 89.69 | 0.127 | linked |
| 2 | 0.0011 |  | 10.31 | 2.433 | linked |

| Shift | :  -0.0514 ns |
| --- | --- |
| Decay Background | :  2.0862 |
| IRF Background | :  0.6000 |

**File: Em1=370.00nm**

**Global Analysis (Reconvolution)**

| Fitting range | :  [200; 700] channels |
| --- | --- |
| | Global | ² | | --- | --- | | :  1.302 |
| ² | :  1.274 |

|  | Bi | | fi | i (ns) | |
| --- | --- | --- | --- | --- | --- |
| 1 | 0.1632 |  | 88.40 | 0.127 | linked |
| 2 | 0.0011 |  | 11.60 | 2.433 | linked |

| Shift | :  -0.0391 ns |
| --- | --- |
| Decay Background | :  2.7184 |
| IRF Background | :  0.6000 |

**File: Em1=380.00nm**

**Global Analysis (Reconvolution)**

| Fitting range | :  [201; 700] channels |
| --- | --- |
| | Global | ² | | --- | --- | | :  1.302 |
| ² | :  1.341 |

|  | Bi | | fi | i (ns) | |
| --- | --- | --- | --- | --- | --- |
| 1 | 0.1392 |  | 85.91 | 0.127 | linked |
| 2 | 0.0012 |  | 14.09 | 2.433 | linked |

| Shift | :  -0.0510 ns |
| --- | --- |
| Decay Background | :  2.2448 |
| IRF Background | :  0.6000 |

**File: Em1=390.00nm**

**Global Analysis (Reconvolution)**

| Fitting range | :  [196; 700] channels |
| --- | --- |
| | Global | ² | | --- | --- | | :  1.302 |
| ² | :  1.419 |

|  | Bi | | fi | i (ns) | |
| --- | --- | --- | --- | --- | --- |
| 1 | 0.1120 |  | 83.21 | 0.127 | linked |
| 2 | 0.0012 |  | 16.79 | 2.433 | linked |

| Shift | :  -0.0977 ns |
| --- | --- |
| Decay Background | :  2.3790 |
| IRF Background | :  0.6000 |

**File: Em1=400.00nm**

**Global Analysis (Reconvolution)**

| Fitting range | :  [202; 700] channels |
| --- | --- |
| | Global | ² | | --- | --- | | :  1.302 |
| ² | :  1.278 |

|  | Bi | | fi | i (ns) | |
| --- | --- | --- | --- | --- | --- |
| 1 | 0.0769 |  | 80.35 | 0.127 | linked |
| 2 | 0.0010 |  | 19.65 | 2.433 | linked |

| Shift | :  -0.0427 ns |
| --- | --- |
| Decay Background | :  3.1892 |
| IRF Background | :  0.6000 |

**File: Em1=410.00nm**

**Global Analysis (Reconvolution)**

| Fitting range | :  [200; 700] channels |
| --- | --- |
| | Global | ² | | --- | --- | | :  1.302 |
| ² | :  1.624 |

|  | Bi | | fi | i (ns) | |
| --- | --- | --- | --- | --- | --- |
| 1 | 0.0587 |  | 77.32 | 0.127 | linked |
| 2 | 0.0009 |  | 22.68 | 2.433 | linked |

| Shift | :  -0.1172 ns |
| --- | --- |
| Decay Background | :  2.6179 |
| IRF Background | :  0.6000 |

**File: Em1=420.00nm**

**Global Analysis (Reconvolution)**

| Fitting range | :  [203; 700] channels |
| --- | --- |
| | Global | ² | | --- | --- | | :  1.302 |
| ² | :  1.381 |

|  | Bi | | fi | i (ns) | |
| --- | --- | --- | --- | --- | --- |
| 1 | 0.0382 |  | 72.45 | 0.127 | linked |
| 2 | 0.0008 |  | 27.55 | 2.433 | linked |

| Shift | :  -0.0781 ns |
| --- | --- |
| Decay Background | :  2.4877 |
| IRF Background | :  0.6000 |

**File: Em1=430.00nm**

**Global Analysis (Reconvolution)**

| Fitting range | :  [208; 700] channels |
| --- | --- |
| | Global | ² | | --- | --- | | :  1.302 |
| ² | :  1.387 |

|  | Bi | | fi | i (ns) | |
| --- | --- | --- | --- | --- | --- |
| 1 | 0.0281 |  | 67.55 | 0.127 | linked |
| 2 | 0.0007 |  | 32.45 | 2.433 | linked |

| Shift | :  -0.1953 ns |
| --- | --- |
| Decay Background | :  1.6332 |
| IRF Background | :  0.6000 |

**File: Em1=440.00nm**

**Global Analysis (Reconvolution)**

| Fitting range | :  [204; 700] channels |
| --- | --- |
| | Global | ² | | --- | --- | | :  1.302 |
| ² | :  1.370 |

|  | Bi | | fi | i (ns) | |
| --- | --- | --- | --- | --- | --- |
| 1 | 0.0138 |  | 60.46 | 0.127 | linked |
| 2 | 0.0005 |  | 39.54 | 2.433 | linked |

| Shift | :  -7e-6 ns |
| --- | --- |
| Decay Background | :  1.9908 |
| IRF Background | :  0.6000 |

**File: Em1=450.00nm**

**Global Analysis (Reconvolution)**

| Fitting range | :  [204; 700] channels |
| --- | --- |
| | Global | ² | | --- | --- | | :  1.302 |
| ² | :  1.142 |

|  | Bi | | fi | i (ns) | |
| --- | --- | --- | --- | --- | --- |
| 1 | 0.0079 |  | 48.22 | 0.127 | linked |
| 2 | 0.0004 |  | 51.78 | 2.433 | linked |

| Shift | :  0.0459 ns |
| --- | --- |
| Decay Background | :  0.8921 |
| IRF Background | :  0.6000 |

**File: Em1=460.00nm**

**Global Analysis (Reconvolution)**

| Fitting range | :  [207; 700] channels |
| --- | --- |
| | Global | ² | | --- | --- | | :  1.302 |
| ² | :  1.258 |

|  | Bi | | fi | i (ns) | |
| --- | --- | --- | --- | --- | --- |
| 1 | 0.0057 |  | 47.92 | 0.127 | linked |
| 2 | 0.0003 |  | 52.08 | 2.433 | linked |

| Shift | :  -5e-6 ns |
| --- | --- |
| Decay Background | :  1.2734 |
| IRF Background | :  0.6000 |

**File: Em1=470.00nm**

**Global Analysis (Reconvolution)**

| Fitting range | :  [219; 700] channels |
| --- | --- |
| | Global | ² | | --- | --- | | :  1.302 |
| ² | :  1.246 |

|  | Bi | | fi | i (ns) | |
| --- | --- | --- | --- | --- | --- |
| 1 | 0.0179 |  | 68.44 | 0.127 | linked |
| 2 | 0.0004 |  | 31.56 | 2.433 | linked |

| Shift | :  -0.6250 ns |
| --- | --- |
| Decay Background | :  0.1238 |
| IRF Background | :  0.6000 |

**File: Em1=480.00nm**

**Global Analysis (Reconvolution)**

| Fitting range | :  [206; 700] channels |
| --- | --- |
| | Global | ² | | --- | --- | | :  1.302 |
| ² | :  1.062 |

|  | Bi | | fi | i (ns) | |
| --- | --- | --- | --- | --- | --- |
| 1 | 0.0022 |  | 31.99 | 0.127 | linked |
| 2 | 0.0002 |  | 68.01 | 2.433 | linked |

| Shift | :  -0.0195 ns |
| --- | --- |
| Decay Background | :  0.5745 |
| IRF Background | :  0.6000 |

**APPENDIX V**

**Global Analysis Data of W-Me-*β*-CD (pH 9; 320 nm)**

**File: Em1=330.00nm**

**Global Analysis (Reconvolution)**

| Fitting range | :  [218; 700] channels |
| --- | --- |
| | Global | ² | | --- | --- | | :  1.253 |
| ² | :  1.215 |

|  | Bi | | fi | i (ns) | |
| --- | --- | --- | --- | --- | --- |
| 1 | 0.0524 |  | 41.84 | 0.259 | linked |
| 2 | 0.0151 |  | 58.16 | 1.248 | linked |

| Shift | :  -0.0071 ns |
| --- | --- |
| Decay Background | :  1.4812 |
| IRF Background | :  0.6000 |

**File: Em1=335.00nm**

**Global Analysis (Reconvolution)**

| Fitting range | :  [217; 700] channels |
| --- | --- |
| | Global | ² | | --- | --- | | :  1.253 |
| ² | :  1.311 |

|  | Bi | | fi | i (ns) | |
| --- | --- | --- | --- | --- | --- |
| 1 | 0.0705 |  | 39.78 | 0.259 | linked |
| 2 | 0.0222 |  | 60.22 | 1.248 | linked |

| Shift | :  0.0781 ns |
| --- | --- |
| Decay Background | :  1.7349 |
| IRF Background | :  0.6000 |

**File: Em1=340.00nm**

**Global Analysis (Reconvolution)**

| Fitting range | :  [221; 700] channels |
| --- | --- |
| | Global | ² | | --- | --- | | :  1.253 |
| ² | :  1.341 |

|  | Bi | | fi | i (ns) | |
| --- | --- | --- | --- | --- | --- |
| 1 | 0.1063 |  | 38.57 | 0.259 | linked |
| 2 | 0.0352 |  | 61.43 | 1.248 | linked |

| Shift | :  0.0693 ns |
| --- | --- |
| Decay Background | :  2.0643 |
| IRF Background | :  0.6000 |

**File: Em1=345.00nm**

**Global Analysis (Reconvolution)**

| Fitting range | :  [218; 700] channels |
| --- | --- |
| | Global | ² | | --- | --- | | :  1.253 |
| ² | :  1.187 |

|  | Bi | | fi | i (ns) | |
| --- | --- | --- | --- | --- | --- |
| 1 | 0.1558 |  | 38.86 | 0.259 | linked |
| 2 | 0.0510 |  | 61.14 | 1.248 | linked |

| Shift | :  0.1477 ns |
| --- | --- |
| Decay Background | :  4.2210 |
| IRF Background | :  0.6000 |

**File: Em1=350.00nm**

**Global Analysis (Reconvolution)**

| Fitting range | :  [221; 700] channels |
| --- | --- |
| | Global | ² | | --- | --- | | :  1.253 |
| ² | :  1.231 |

|  | Bi | | fi | i (ns) | |
| --- | --- | --- | --- | --- | --- |
| 1 | 0.2122 |  | 37.53 | 0.259 | linked |
| 2 | 0.0734 |  | 62.47 | 1.248 | linked |

| Shift | :  0.1527 ns |
| --- | --- |
| Decay Background | :  5.0772 |
| IRF Background | :  0.6000 |

**File: Em1=355.00nm**

**Global Analysis (Reconvolution)**

| Fitting range | :  [216; 700] channels |
| --- | --- |
| | Global | ² | | --- | --- | | :  1.253 |
| ² | :  1.496 |

|  | Bi | | fi | i (ns) | |
| --- | --- | --- | --- | --- | --- |
| 1 | 0.2801 |  | 36.23 | 0.259 | linked |
| 2 | 0.1025 |  | 63.77 | 1.248 | linked |

| Shift | :  0.1117 ns |
| --- | --- |
| Decay Background | :  6.9354 |
| IRF Background | :  0.6000 |

**File: Em1=360.00nm**

**Global Analysis (Reconvolution)**

| Fitting range | :  [218; 700] channels |
| --- | --- |
| | Global | ² | | --- | --- | | :  1.253 |
| ² | :  1.281 |

|  | Bi | | fi | i (ns) | |
| --- | --- | --- | --- | --- | --- |
| 1 | 0.3405 |  | 35.73 | 0.259 | linked |
| 2 | 0.1273 |  | 64.27 | 1.248 | linked |

| Shift | :  0.1313 ns |
| --- | --- |
| Decay Background | :  8.7025 |
| IRF Background | :  0.6000 |

**File: Em1=365.00nm**

**Global Analysis (Reconvolution)**

| Fitting range | :  [218; 700] channels |
| --- | --- |
| | Global | ² | | --- | --- | | :  1.253 |
| ² | :  1.466 |

|  | Bi | | fi | i (ns) | |
| --- | --- | --- | --- | --- | --- |
| 1 | 0.4045 |  | 35.49 | 0.259 | linked |
| 2 | 0.1528 |  | 64.51 | 1.248 | linked |

| Shift | :  0.1396 ns |
| --- | --- |
| Decay Background | :  9.7300 |
| IRF Background | :  0.6000 |

**File: Em1=370.00nm**

**Global Analysis (Reconvolution)**

| Fitting range | :  [218; 700] channels |
| --- | --- |
| | Global | ² | | --- | --- | | :  1.253 |
| ² | :  1.378 |

|  | Bi | | fi | i (ns) | |
| --- | --- | --- | --- | --- | --- |
| 1 | 0.4601 |  | 35.08 | 0.259 | linked |
| 2 | 0.1770 |  | 64.92 | 1.248 | linked |

| Shift | :  0.1486 ns |
| --- | --- |
| Decay Background | :  11.44 |
| IRF Background | :  0.6000 |

**File: Em1=375.00nm**

**Global Analysis (Reconvolution)**

| Fitting range | :  [217; 700] channels |
| --- | --- |
| | Global | ² | | --- | --- | | :  1.253 |
| ² | :  1.585 |

|  | Bi | | fi | i (ns) | |
| --- | --- | --- | --- | --- | --- |
| 1 | 0.5019 |  | 34.41 | 0.259 | linked |
| 2 | 0.1988 |  | 65.59 | 1.248 | linked |

| Shift | :  0.1444 ns |
| --- | --- |
| Decay Background | :  12.98 |
| IRF Background | :  0.6000 |

**File: Em1=380.00nm**

**Global Analysis (Reconvolution)**

| Fitting range | :  [216; 700] channels |
| --- | --- |
| | Global | ² | | --- | --- | | :  1.253 |
| ² | :  1.532 |

|  | Bi | | fi | i (ns) | |
| --- | --- | --- | --- | --- | --- |
| 1 | 0.5336 |  | 33.83 | 0.259 | linked |
| 2 | 0.2168 |  | 66.17 | 1.248 | linked |

| Shift | :  0.1332 ns |
| --- | --- |
| Decay Background | :  13.65 |
| IRF Background | :  0.6000 |

**File: Em1=385.00nm**

**Global Analysis (Reconvolution)**

| Fitting range | :  [221; 700] channels |
| --- | --- |
| | Global | ² | | --- | --- | | :  1.253 |
| ² | :  1.455 |

|  | Bi | | fi | i (ns) | |
| --- | --- | --- | --- | --- | --- |
| 1 | 0.5510 |  | 33.82 | 0.259 | linked |
| 2 | 0.2241 |  | 66.18 | 1.248 | linked |

| Shift | :  0.1514 ns |
| --- | --- |
| Decay Background | :  14.16 |
| IRF Background | :  0.6000 |

**File: Em1=390.00nm**

**Global Analysis (Reconvolution)**

| Fitting range | :  [220; 700] channels |
| --- | --- |
| | Global | ² | | --- | --- | | :  1.253 |
| ² | :  1.532 |

|  | Bi | | fi | i (ns) | |
| --- | --- | --- | --- | --- | --- |
| 1 | 0.5608 |  | 34.54 | 0.259 | linked |
| 2 | 0.2209 |  | 65.46 | 1.248 | linked |

| Shift | :  0.1744 ns |
| --- | --- |
| Decay Background | :  15.06 |
| IRF Background | :  0.6000 |

**File: Em1=395.00nm**

**Global Analysis (Reconvolution)**

| Fitting range | :  [222; 700] channels |
| --- | --- |
| | Global | ² | | --- | --- | | :  1.253 |
| ² | :  1.612 |

|  | Bi | | fi | i (ns) | |
| --- | --- | --- | --- | --- | --- |
| 1 | 0.5432 |  | 34.19 | 0.259 | linked |
| 2 | 0.2173 |  | 65.81 | 1.248 | linked |

| Shift | :  0.1929 ns |
| --- | --- |
| Decay Background | :  15.69 |
| IRF Background | :  0.6000 |

**File: Em1=400.00nm**

**Global Analysis (Reconvolution)**

| Fitting range | :  [223; 700] channels |
| --- | --- |
| | Global | ² | | --- | --- | | :  1.253 |
| ² | :  1.668 |

|  | Bi | | fi | i (ns) | |
| --- | --- | --- | --- | --- | --- |
| 1 | 0.5264 |  | 34.02 | 0.259 | linked |
| 2 | 0.2121 |  | 65.98 | 1.248 | linked |

| Shift | :  0.1842 ns |
| --- | --- |
| Decay Background | :  14.83 |
| IRF Background | :  0.6000 |

**File: Em1=405.00nm**

**Global Analysis (Reconvolution)**

| Fitting range | :  [221; 700] channels |
| --- | --- |
| | Global | ² | | --- | --- | | :  1.253 |
| ² | :  1.434 |

|  | Bi | | fi | i (ns) | |
| --- | --- | --- | --- | --- | --- |
| 1 | 0.4933 |  | 33.13 | 0.259 | linked |
| 2 | 0.2069 |  | 66.87 | 1.248 | linked |

| Shift | :  0.1658 ns |
| --- | --- |
| Decay Background | :  14.43 |
| IRF Background | :  0.6000 |

**File: Em1=410.00nm**

**Global Analysis (Reconvolution)**

| Fitting range | :  [222; 700] channels |
| --- | --- |
| | Global | ² | | --- | --- | | :  1.253 |
| ² | :  1.380 |

|  | Bi | | fi | i (ns) | |
| --- | --- | --- | --- | --- | --- |
| 1 | 0.4553 |  | 32.71 | 0.259 | linked |
| 2 | 0.1947 |  | 67.29 | 1.248 | linked |

| Shift | :  0.1585 ns |
| --- | --- |
| Decay Background | :  13.98 |
| IRF Background | :  0.6000 |

**File: Em1=415.00nm**

**Global Analysis (Reconvolution)**

| Fitting range | :  [220; 700] channels |
| --- | --- |
| | Global | ² | | --- | --- | | :  1.253 |
| ² | :  1.511 |

|  | Bi | | fi | i (ns) | |
| --- | --- | --- | --- | --- | --- |
| 1 | 0.4129 |  | 32.68 | 0.259 | linked |
| 2 | 0.1768 |  | 67.32 | 1.248 | linked |

| Shift | :  0.1779 ns |
| --- | --- |
| Decay Background | :  12.56 |
| IRF Background | :  0.6000 |

**File: Em1=420.00nm**

**Global Analysis (Reconvolution)**

| Fitting range | :  [224; 700] channels |
| --- | --- |
| | Global | ² | | --- | --- | | :  1.253 |
| ² | :  1.498 |

|  | Bi | | fi | i (ns) | |
| --- | --- | --- | --- | --- | --- |
| 1 | 0.3752 |  | 33.82 | 0.259 | linked |
| 2 | 0.1526 |  | 66.18 | 1.248 | linked |

| Shift | :  0.2195 ns |
| --- | --- |
| Decay Background | :  12.78 |
| IRF Background | :  0.6000 |

**File: Em1=425.00nm**

**Global Analysis (Reconvolution)**

| Fitting range | :  [226; 700] channels |
| --- | --- |
| | Global | ² | | --- | --- | | :  1.253 |
| ² | :  1.397 |

|  | Bi | | fi | i (ns) | |
| --- | --- | --- | --- | --- | --- |
| 1 | 0.3279 |  | 32.92 | 0.259 | linked |
| 2 | 0.1389 |  | 67.08 | 1.248 | linked |

| Shift | :  0.1953 ns |
| --- | --- |
| Decay Background | :  11.28 |
| IRF Background | :  0.6000 |

**File: Em1=430.00nm**

**Global Analysis (Reconvolution)**

| Fitting range | :  [223; 700] channels |
| --- | --- |
| | Global | ² | | --- | --- | | :  1.253 |
| ² | :  1.237 |

|  | Bi | | fi | i (ns) | |
| --- | --- | --- | --- | --- | --- |
| 1 | 0.2836 |  | 31.93 | 0.259 | linked |
| 2 | 0.1257 |  | 68.07 | 1.248 | linked |

| Shift | :  0.1733 ns |
| --- | --- |
| Decay Background | :  10.30 |
| IRF Background | :  0.6000 |

**File: Em1=435.00nm**

**Global Analysis (Reconvolution)**

| Fitting range | :  [217; 700] channels |
| --- | --- |
| | Global | ² | | --- | --- | | :  1.253 |
| ² | :  1.181 |

|  | Bi | | fi | i (ns) | |
| --- | --- | --- | --- | --- | --- |
| 1 | 0.2434 |  | 31.18 | 0.259 | linked |
| 2 | 0.1117 |  | 68.82 | 1.248 | linked |

| Shift | :  0.1482 ns |
| --- | --- |
| Decay Background | :  8.7256 |
| IRF Background | :  0.6000 |

**File: Em1=440.00nm**

**Global Analysis (Reconvolution)**

| Fitting range | :  [220; 700] channels |
| --- | --- |
| | Global | ² | | --- | --- | | :  1.253 |
| ² | :  1.037 |

|  | Bi | | fi | i (ns) | |
| --- | --- | --- | --- | --- | --- |
| 1 | 0.2075 |  | 31.08 | 0.259 | linked |
| 2 | 0.0957 |  | 68.92 | 1.248 | linked |

| Shift | :  0.1525 ns |
| --- | --- |
| Decay Background | :  8.1860 |
| IRF Background | :  0.6000 |

**File: Em1=445.00nm**

**Global Analysis (Reconvolution)**

| Fitting range | :  [221; 700] channels |
| --- | --- |
| | Global | ² | | --- | --- | | :  1.253 |
| ² | :  1.289 |

|  | Bi | | fi | i (ns) | |
| --- | --- | --- | --- | --- | --- |
| 1 | 0.1769 |  | 31.27 | 0.259 | linked |
| 2 | 0.0808 |  | 68.73 | 1.248 | linked |

| Shift | :  0.1634 ns |
| --- | --- |
| Decay Background | :  7.4017 |
| IRF Background | :  0.6000 |

**File: Em1=450.00nm**

**Global Analysis (Reconvolution)**

| Fitting range | :  [216; 700] channels |
| --- | --- |
| | Global | ² | | --- | --- | | :  1.253 |
| ² | :  1.363 |

|  | Bi | | fi | i (ns) | |
| --- | --- | --- | --- | --- | --- |
| 1 | 0.1432 |  | 28.97 | 0.259 | linked |
| 2 | 0.0730 |  | 71.03 | 1.248 | linked |

| Shift | :  0.0997 ns |
| --- | --- |
| Decay Background | :  6.2817 |
| IRF Background | :  0.6000 |

**File: Em1=455.00nm**

**Global Analysis (Reconvolution)**

| Fitting range | :  [219; 700] channels |
| --- | --- |
| | Global | ² | | --- | --- | | :  1.253 |
| ² | :  1.175 |

|  | Bi | | fi | i (ns) | |
| --- | --- | --- | --- | --- | --- |
| 1 | 0.1249 |  | 31.40 | 0.259 | linked |
| 2 | 0.0567 |  | 68.60 | 1.248 | linked |

| Shift | :  0.1771 ns |
| --- | --- |
| Decay Background | :  4.9216 |
| IRF Background | :  0.6000 |

**File: Em1=460.00nm**

**Global Analysis (Reconvolution)**

| Fitting range | :  [217; 700] channels |
| --- | --- |
| | Global | ² | | --- | --- | | :  1.253 |
| ² | :  1.175 |

|  | Bi | | fi | i (ns) | |
| --- | --- | --- | --- | --- | --- |
| 1 | 0.1067 |  | 31.15 | 0.259 | linked |
| 2 | 0.0490 |  | 68.85 | 1.248 | linked |

| Shift | :  0.1482 ns |
| --- | --- |
| Decay Background | :  4.3856 |
| IRF Background | :  0.6000 |

**File: Em1=465.00nm**

**Global Analysis (Reconvolution)**

| Fitting range | :  [225; 700] channels |
| --- | --- |
| | Global | ² | | --- | --- | | :  1.253 |
| ² | :  1.142 |

|  | Bi | | fi | i (ns) | |
| --- | --- | --- | --- | --- | --- |
| 1 | 0.0880 |  | 30.09 | 0.259 | linked |
| 2 | 0.0425 |  | 69.91 | 1.248 | linked |

| Shift | :  0.1172 ns |
| --- | --- |
| Decay Background | :  3.2145 |
| IRF Background | :  0.6000 |

**File: Em1=470.00nm**

**Global Analysis (Reconvolution)**

| Fitting range | :  [224; 700] channels |
| --- | --- |
| | Global | ² | | --- | --- | | :  1.253 |
| ² | :  1.442 |

|  | Bi | | fi | i (ns) | |
| --- | --- | --- | --- | --- | --- |
| 1 | 0.0746 |  | 31.85 | 0.259 | linked |
| 2 | 0.0332 |  | 68.15 | 1.248 | linked |

| Shift | :  0.1897 ns |
| --- | --- |
| Decay Background | :  3.4595 |
| IRF Background | :  0.6000 |

**File: Em1=475.00nm**

**Global Analysis (Reconvolution)**

| Fitting range | :  [229; 700] channels |
| --- | --- |
| | Global | ² | | --- | --- | | :  1.253 |
| ² | :  1.072 |

|  | Bi | | fi | i (ns) | |
| --- | --- | --- | --- | --- | --- |
| 1 | 0.0606 |  | 31.22 | 0.259 | linked |
| 2 | 0.0278 |  | 68.78 | 1.248 | linked |

| Shift | :  0.1952 ns |
| --- | --- |
| Decay Background | :  3.2892 |
| IRF Background | :  0.6000 |

**File: Em1=480.00nm**

**Global Analysis (Reconvolution)**

| Fitting range | :  [226; 700] channels |
| --- | --- |
| | Global | ² | | --- | --- | | :  1.253 |
| ² | :  1.242 |

|  | Bi | | fi | i (ns) | |
| --- | --- | --- | --- | --- | --- |
| 1 | 0.0512 |  | 31.71 | 0.259 | linked |
| 2 | 0.0229 |  | 68.29 | 1.248 | linked |

| Shift | :  0.2066 ns |
| --- | --- |
| Decay Background | :  2.3549 |
| IRF Background | :  0.6000 |

**File: Em1=485.00nm**

**Global Analysis (Reconvolution)**

| Fitting range | :  [223; 700] channels |
| --- | --- |
| | Global | ² | | --- | --- | | :  1.253 |
| ² | :  1.200 |

|  | Bi | | fi | i (ns) | |
| --- | --- | --- | --- | --- | --- |
| 1 | 0.0409 |  | 28.09 | 0.259 | linked |
| 2 | 0.0218 |  | 71.91 | 1.248 | linked |

| Shift | :  0.0804 ns |
| --- | --- |
| Decay Background | :  2.3291 |
| IRF Background | :  0.6000 |

**File: Em1=490.00nm**

**Global Analysis (Reconvolution)**

| Fitting range | :  [212; 700] channels |
| --- | --- |
| | Global | ² | | --- | --- | | :  1.253 |
| ² | :  1.314 |

|  | Bi | | fi | i (ns) | |
| --- | --- | --- | --- | --- | --- |
| 1 | 0.0357 |  | 29.66 | 0.259 | linked |
| 2 | 0.0176 |  | 70.34 | 1.248 | linked |

| Shift | :  0.0956 ns |
| --- | --- |
| Decay Background | :  2.0109 |
| IRF Background | :  0.6000 |

**File: Em1=495.00nm**

**Global Analysis (Reconvolution)**

| Fitting range | :  [227; 700] channels |
| --- | --- |
| | Global | ² | | --- | --- | | :  1.253 |
| ² | :  1.130 |

|  | Bi | | fi | i (ns) | |
| --- | --- | --- | --- | --- | --- |
| 1 | 0.0298 |  | 30.73 | 0.259 | linked |
| 2 | 0.0140 |  | 69.27 | 1.248 | linked |

| Shift | :  0.1367 ns |
| --- | --- |
| Decay Background | :  1.7137 |
| IRF Background | :  0.6000 |

**File: Em1=500.00nm**

**Global Analysis (Reconvolution)**

| Fitting range | :  [218; 700] channels |
| --- | --- |
| | Global | ² | | --- | --- | | :  1.253 |
| ² | :  1.068 |

|  | Bi | | fi | i (ns) | |
| --- | --- | --- | --- | --- | --- |
| 1 | 0.0229 |  | 28.46 | 0.259 | linked |
| 2 | 0.0119 |  | 71.54 | 1.248 | linked |

| Shift | :  0.1115 ns |
| --- | --- |
| Decay Background | :  1.3398 |
| IRF Background | :  0.6000 |

**File: Em1=505.00nm**

**Global Analysis (Reconvolution)**

| Fitting range | :  [215; 700] channels |
| --- | --- |
| | Global | ² | | --- | --- | | :  1.253 |
| ² | :  1.106 |

|  | Bi | | fi | i (ns) | |
| --- | --- | --- | --- | --- | --- |
| 1 | 0.0210 |  | 32.54 | 0.259 | linked |
| 2 | 0.0091 |  | 67.46 | 1.248 | linked |

| Shift | :  0.1656 ns |
| --- | --- |
| Decay Background | :  1.0679 |
| IRF Background | :  0.6000 |

**File: Em1=510.00nm**

**Global Analysis (Reconvolution)**

| Fitting range | :  [221; 700] channels |
| --- | --- |
| | Global | ² | | --- | --- | | :  1.253 |
| ² | :  1.121 |

|  | Bi | | fi | i (ns) | |
| --- | --- | --- | --- | --- | --- |
| 1 | 0.0154 |  | 29.12 | 0.259 | linked |
| 2 | 0.0078 |  | 70.88 | 1.248 | linked |

| Shift | :  0.1367 ns |
| --- | --- |
| Decay Background | :  1.3310 |
| IRF Background | :  0.6000 |

**File: Em1=515.00nm**

**Global Analysis (Reconvolution)**

| Fitting range | :  [228; 700] channels |
| --- | --- |
| | Global | ² | | --- | --- | | :  1.253 |
| ² | :  1.079 |

|  | Bi | | fi | i (ns) | |
| --- | --- | --- | --- | --- | --- |
| 1 | 0.0131 |  | 30.77 | 0.259 | linked |
| 2 | 0.0061 |  | 69.23 | 1.248 | linked |

| Shift | :  0.1454 ns |
| --- | --- |
| Decay Background | :  0.7937 |
| IRF Background | :  0.6000 |

**File: Em1=520.00nm**

**Global Analysis (Reconvolution)**

| Fitting range | :  [221; 700] channels |
| --- | --- |
| | Global | ² | | --- | --- | | :  1.253 |
| ² | :  1.008 |

|  | Bi | | fi | i (ns) | |
| --- | --- | --- | --- | --- | --- |
| 1 | 0.0104 |  | 28.63 | 0.259 | linked |
| 2 | 0.0054 |  | 71.37 | 1.248 | linked |

| Shift | :  0.0298 ns |
| --- | --- |
| Decay Background | :  0.8950 |
| IRF Background | :  0.6000 |

**File: Em1=525.00nm**

**Global Analysis (Reconvolution)**

| Fitting range | :  [215; 700] channels |
| --- | --- |
| | Global | ² | | --- | --- | | :  1.253 |
| ² | :  0.979 |

|  | Bi | | fi | i (ns) | |
| --- | --- | --- | --- | --- | --- |
| 1 | 0.0080 |  | 28.51 | 0.259 | linked |
| 2 | 0.0041 |  | 71.49 | 1.248 | linked |

| Shift | :  0.0675 ns |
| --- | --- |
| Decay Background | :  0.6009 |
| IRF Background | :  0.6000 |

**File: Em1=530.00nm**

**Global Analysis (Reconvolution)**

| Fitting range | :  [211; 700] channels |
| --- | --- |
| | Global | ² | | --- | --- | | :  1.253 |
| ² | :  1.048 |

|  | Bi | | fi | i (ns) | |
| --- | --- | --- | --- | --- | --- |
| 1 | 0.0052 |  | 22.01 | 0.259 | linked |
| 2 | 0.0039 |  | 77.99 | 1.248 | linked |

| Shift | :  -0.0679 ns |
| --- | --- |
| Decay Background | :  0.3592 |
| IRF Background | :  0.6000 |

**File: Em1=535.00nm**

**Global Analysis (Reconvolution)**

| Fitting range | :  [224; 700] channels |
| --- | --- |
| | Global | ² | | --- | --- | | :  1.253 |
| ² | :  0.924 |

|  | Bi | | fi | i (ns) | |
| --- | --- | --- | --- | --- | --- |
| 1 | 0.0067 |  | 32.04 | 0.259 | linked |
| 2 | 0.0030 |  | 67.96 | 1.248 | linked |

| Shift | :  -0.0719 ns |
| --- | --- |
| Decay Background | :  0.3084 |
| IRF Background | :  0.6000 |

**File: Em1=540.00nm**

**Global Analysis (Reconvolution)**

| Fitting range | :  [216; 700] channels |
| --- | --- |
| | Global | ² | | --- | --- | | :  1.253 |
| ² | :  0.803 |

|  | Bi | | fi | i (ns) | |
| --- | --- | --- | --- | --- | --- |
| 1 | 0.0046 |  | 32.57 | 0.259 | linked |
| 2 | 0.0020 |  | 67.43 | 1.248 | linked |

| Shift | :  0.0888 ns |
| --- | --- |
| Decay Background | :  0.2895 |
| IRF Background | :  0.6000 |

**File: Em1=545.00nm**

**Global Analysis (Reconvolution)**

| Fitting range | :  [227; 700] channels |
| --- | --- |
| | Global | ² | | --- | --- | | :  1.253 |
| ² | :  0.878 |

|  | Bi | | fi | i (ns) | |
| --- | --- | --- | --- | --- | --- |
| 1 | 0.0037 |  | 29.54 | 0.259 | linked |
| 2 | 0.0018 |  | 70.46 | 1.248 | linked |

| Shift | :  -0.0247 ns |
| --- | --- |
| Decay Background | :  0.4206 |
| IRF Background | :  0.6000 |

**File: Em1=550.00nm**

**Global Analysis (Reconvolution)**

| Fitting range | :  [228; 700] channels |
| --- | --- |
| | Global | ² | | --- | --- | | :  1.253 |
| ² | :  0.847 |

|  | Bi | | fi | i (ns) | |
| --- | --- | --- | --- | --- | --- |
| 1 | 0.0039 |  | 31.83 | 0.259 | linked |
| 2 | 0.0017 |  | 68.17 | 1.248 | linked |

| Shift | :  -0.2150 ns |
| --- | --- |
| Decay Background | :  0.2680 |
| IRF Background | :  0.6000 |

**APPENDIX VI**

**Global Analysis Data of W-Me-*β*-CD (pH 3; 280 nm)**

**File: Em1=310.00nm**

**Global Analysis (Reconvolution)**

| Fitting range | :  [184; 350] channels |
| --- | --- |
| | Global | ² | | --- | --- | | :  0.959 |
| ² | :  1.118 |

|  | Bi | | fi | i (ns) | |
| --- | --- | --- | --- | --- | --- |
| 1 | 0.0128 |  | 100.00 | 0.245 | linked |

| Shift | :  -0.3125 ns |
| --- | --- |
| Decay Background | :  2.4569 |
| IRF Background | :  0.3000 |

**File: Em1=330.00nm**

**Global Analysis (Reconvolution)**

| Fitting range | :  [184; 350] channels |
| --- | --- |
| | Global | ² | | --- | --- | | :  0.959 |
| ² | :  1.222 |

|  | Bi | | fi | i (ns) | |
| --- | --- | --- | --- | --- | --- |
| 1 | 0.0386 |  | 100.00 | 0.245 | linked |

| Shift | :  -0.2734 ns |
| --- | --- |
| Decay Background | :  2.8583 |
| IRF Background | :  0.3000 |

**File: Em1=350.00nm**

**Global Analysis (Reconvolution)**

| Fitting range | :  [184; 350] channels |
| --- | --- |
| | Global | ² | | --- | --- | | :  0.959 |
| ² | :  1.121 |

|  | Bi | | fi | i (ns) | |
| --- | --- | --- | --- | --- | --- |
| 1 | 0.0586 |  | 100.00 | 0.245 | linked |

| Shift | :  -0.1808 ns |
| --- | --- |
| Decay Background | :  2.4454 |
| IRF Background | :  0.3000 |

**File: Em1=370.00nm**

**Global Analysis (Reconvolution)**

| Fitting range | :  [182; 350] channels |
| --- | --- |
| | Global | ² | | --- | --- | | :  0.959 |
| ² | :  1.300 |

|  | Bi | | fi | i (ns) | |
| --- | --- | --- | --- | --- | --- |
| 1 | 0.0605 |  | 100.00 | 0.245 | linked |

| Shift | :  -0.2498 ns |
| --- | --- |
| Decay Background | :  2.0239 |
| IRF Background | :  0.3000 |

**File: Em1=390.00nm**

**Global Analysis (Reconvolution)**

| Fitting range | :  [183; 350] channels |
| --- | --- |
| | Global | ² | | --- | --- | | :  0.959 |
| ² | :  1.262 |

|  | Bi | | fi | i (ns) | |
| --- | --- | --- | --- | --- | --- |
| 1 | 0.0363 |  | 100.00 | 0.245 | linked |

| Shift | :  -0.2144 ns |
| --- | --- |
| Decay Background | :  2.2432 |
| IRF Background | :  0.3000 |

**File: Em1=410.00nm**

**Global Analysis (Reconvolution)**

| Fitting range | :  [189; 350] channels |
| --- | --- |
| | Global | ² | | --- | --- | | :  0.959 |
| ² | :  0.951 |

|  | Bi | | fi | i (ns) | |
| --- | --- | --- | --- | --- | --- |
| 1 | 0.0188 |  | 100.00 | 0.245 | linked |

| Shift | :  -0.2539 ns |
| --- | --- |
| Decay Background | :  1.4608 |
| IRF Background | :  0.3000 |

**File: Em1=430.00nm**

**Global Analysis (Reconvolution)**

| Fitting range | :  [183; 350] channels |
| --- | --- |
| | Global | ² | | --- | --- | | :  0.959 |
| ² | :  0.968 |

|  | Bi | | fi | i (ns) | |
| --- | --- | --- | --- | --- | --- |
| 1 | 0.0080 |  | 100.00 | 0.245 | linked |

| Shift | :  -0.2532 ns |
| --- | --- |
| Decay Background | :  1.0641 |
| IRF Background | :  0.3000 |

**File: Em1=450.00nm**

**Global Analysis (Reconvolution)**

| Fitting range | :  [175; 350] channels |
| --- | --- |
| | Global | ² | | --- | --- | | :  0.959 |
| ² | :  0.689 |

|  | Bi | | fi | i (ns) | |
| --- | --- | --- | --- | --- | --- |
| 1 | 0.0030 |  | 100.00 | 0.245 | linked |

| Shift | :  -0.2539 ns |
| --- | --- |
| Decay Background | :  0.7463 |
| IRF Background | :  0.3000 |

**File: Em1=470.00nm**

**Global Analysis (Reconvolution)**

| Fitting range | :  [191; 350] channels |
| --- | --- |
| | Global | ² | | --- | --- | | :  0.959 |
| ² | :  0.850 |

|  | Bi | | fi | i (ns) | |
| --- | --- | --- | --- | --- | --- |
| 1 | 0.0015 |  | 100.00 | 0.245 | linked |

| Shift | :  -0.3907 ns |
| --- | --- |
| Decay Background | :  0.4401 |
| IRF Background | :  0.3000 |

**File: Em1=490.00nm**

**Global Analysis (Reconvolution)**

| Fitting range | :  [180; 350] channels |
| --- | --- |
| | Global | ² | | --- | --- | | :  0.959 |
| ² | :  0.673 |

|  | Bi | | fi | i (ns) | |
| --- | --- | --- | --- | --- | --- |
| 1 | 0.0007 |  | 100.00 | 0.245 | linked |

| Shift | :  -0.4688 ns |
| --- | --- |
| Decay Background | :  0.5554 |
| IRF Background | :  0.3000 |

**File: Em1=510.00nm**

**Global Analysis (Reconvolution)**

| Fitting range | :  [187; 350] channels |
| --- | --- |
| | Global | ² | | --- | --- | | :  0.959 |
| ² | :  0.398 |

|  | Bi | | fi | i (ns) | |
| --- | --- | --- | --- | --- | --- |
| 1 | 0.0003 |  | 100.00 | 0.245 | linked |

| Shift | :  -0.4297 ns |
| --- | --- |
| Decay Background | :  0.2456 |
| IRF Background | :  0.3000 |
